# Supplementary material for: Two Novel Lipophilic Antioxidants Derivatized from Curcumin
Source: MDPI journal article supplement (doi:10.3390/antiox11040796), 2022-04-18
Supplement: s1 [file s1]

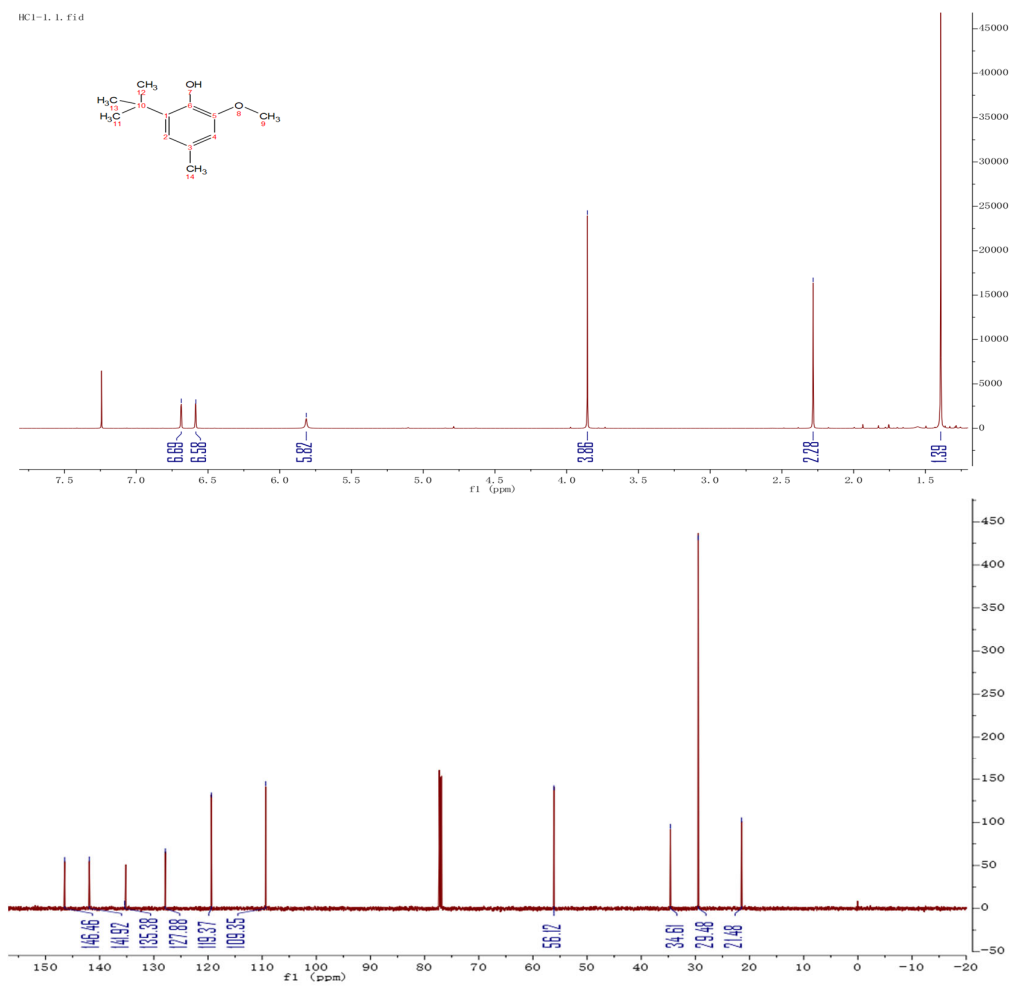

Figure S1. <sup>1</sup>H and <sup>13</sup>C NMR spectrum of 2-Methoxy-4-methyl-6-*tert*-butyl phenol

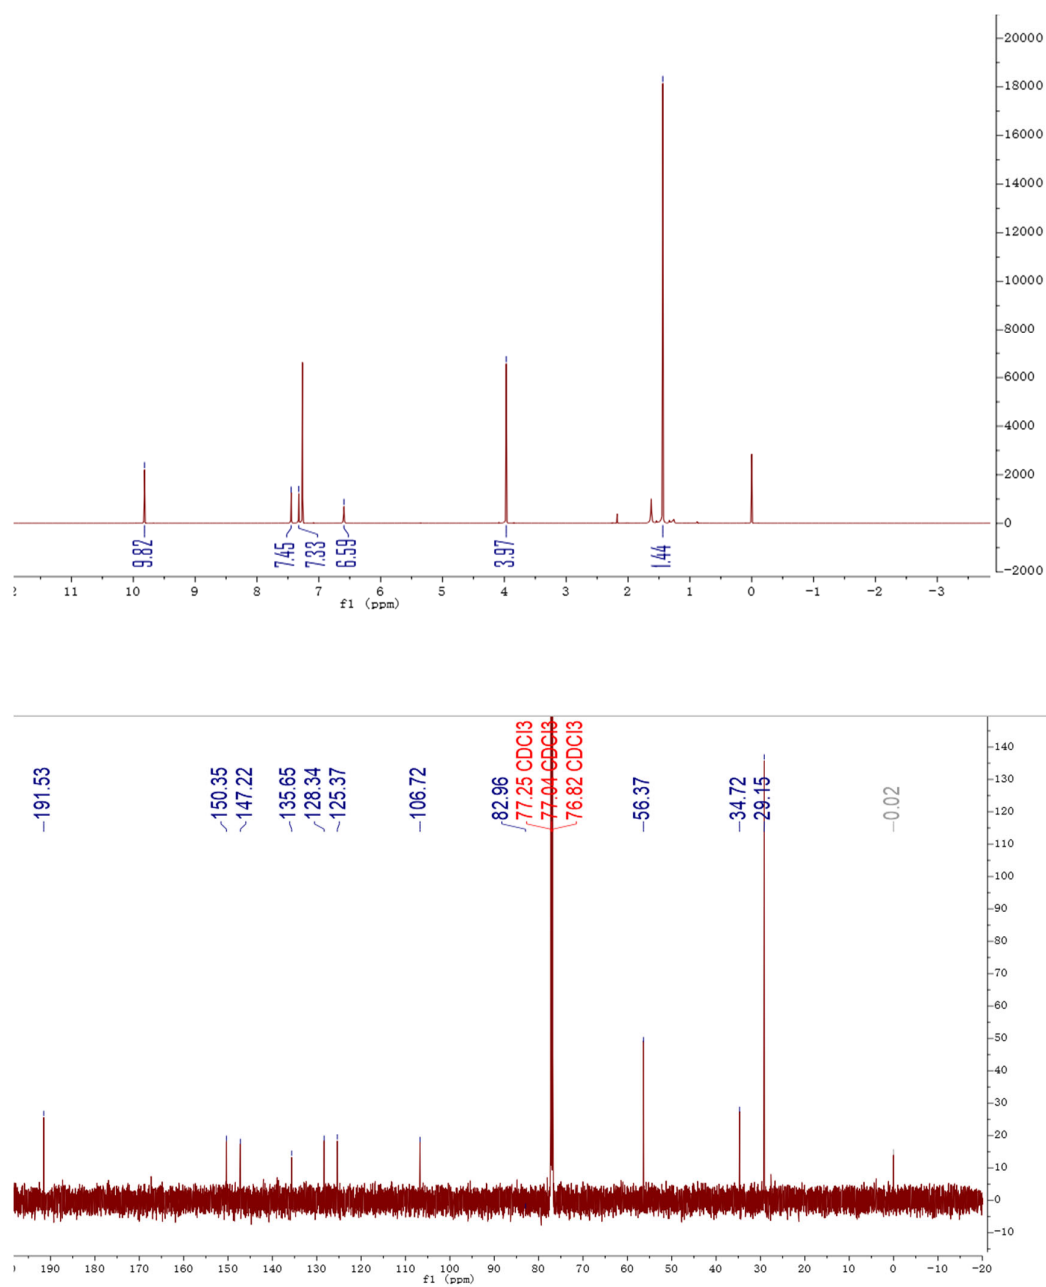

Figure S2.  $^1\text{H}$  and  $^{13}\text{C}$  NMR spectrum of *tert*-butyl vanillin

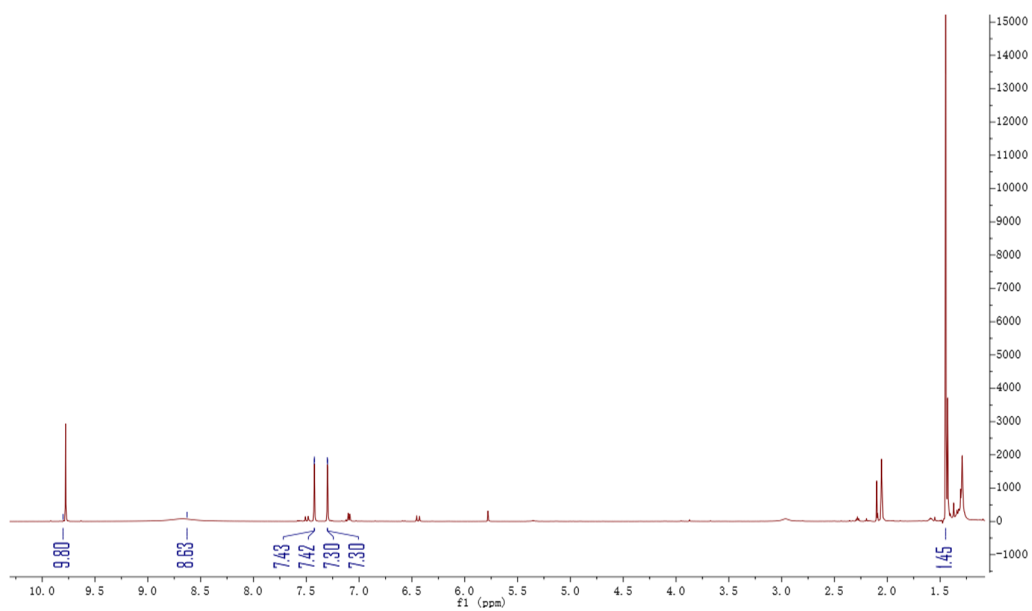

Figure S3.  $^1\text{H}$  and  $^{13}\text{C}$  NMR spectrum of 3-*tert*-butyl-4,5-dihydroxybenzaldehyde

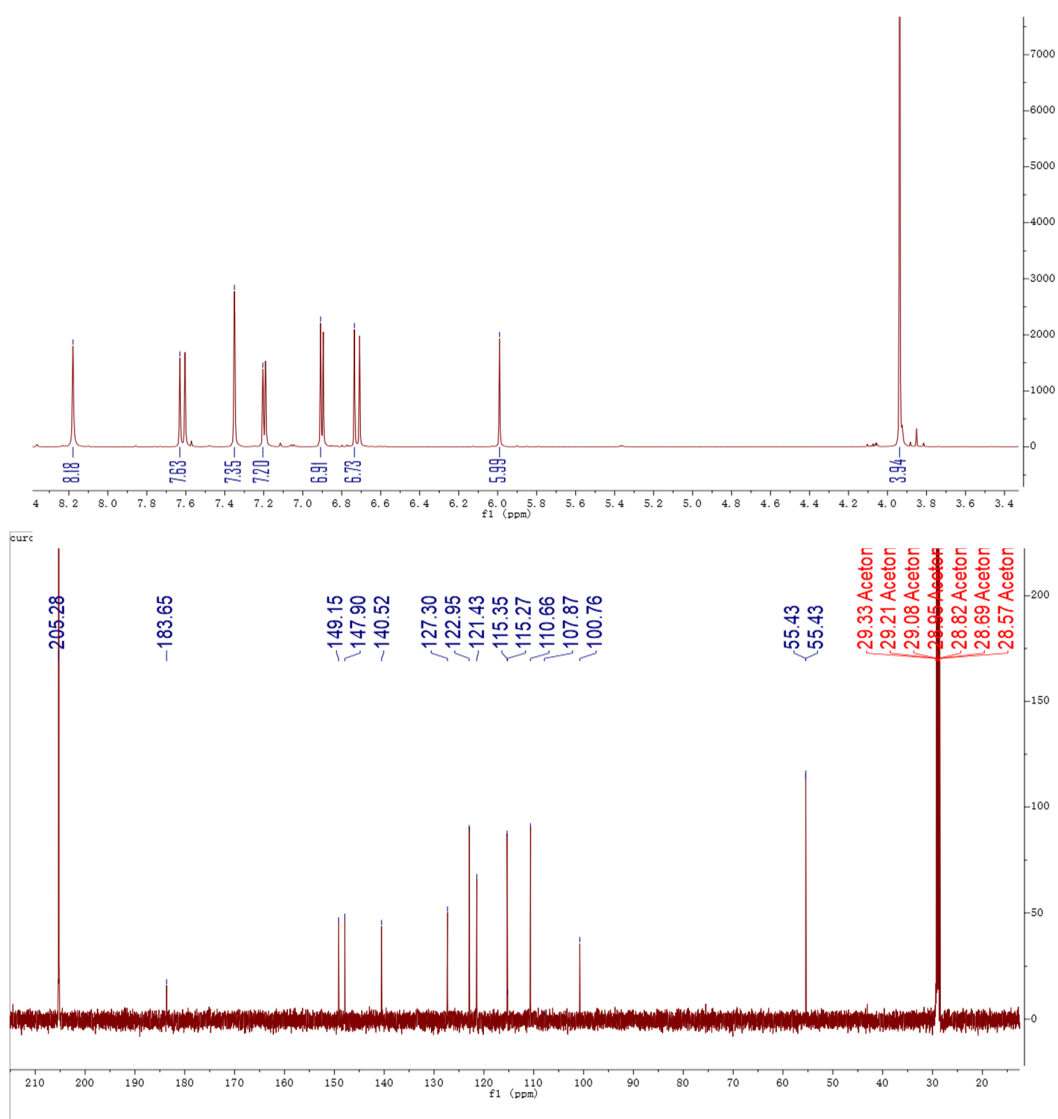

Figure S4.  $^1\text{H}$  and  $^{13}\text{C}$  NMR spectrum of curcumin



MS Zoomed Spectrum

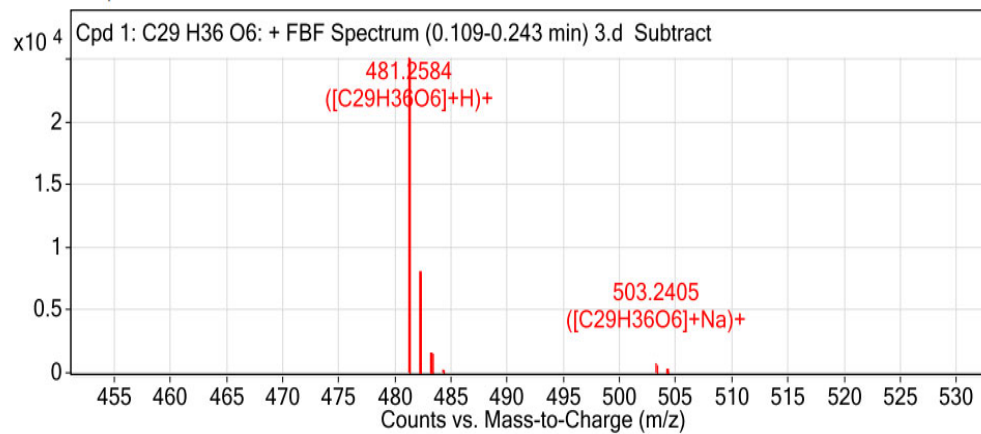

Figure S6. The high resolution mass spectrometry of *tert-butyl* curcumin

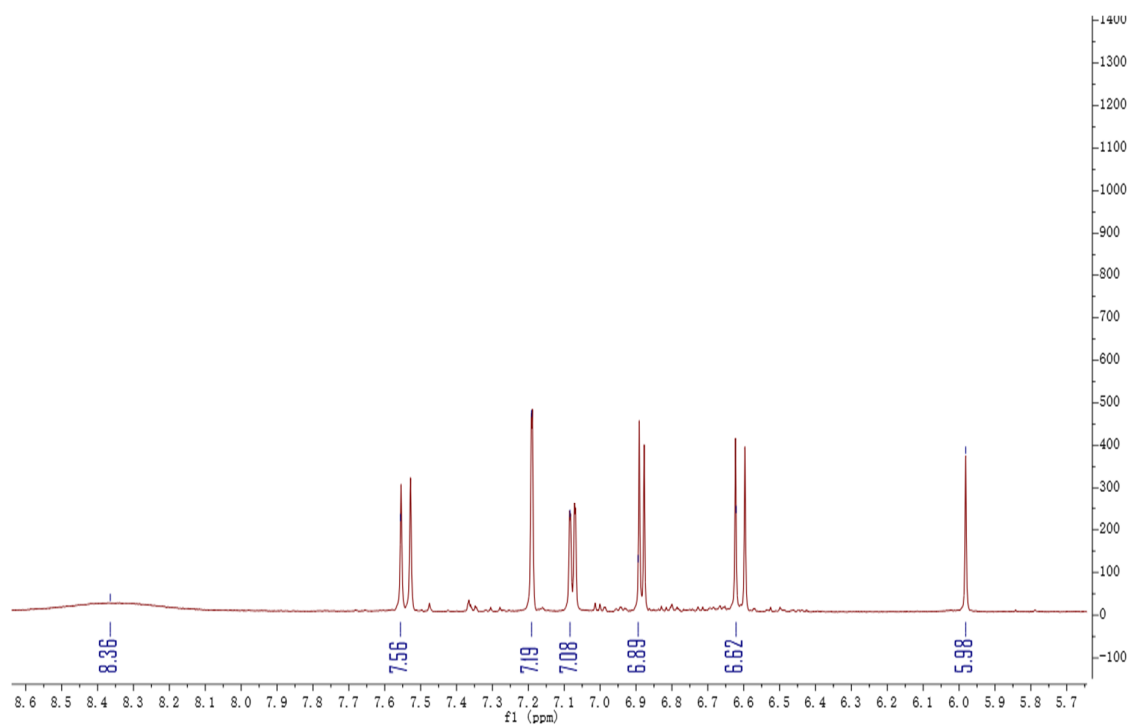

Figure S7.  $^1\text{H}$  and  $^{13}\text{C}$  NMR spectrum of demethylated curcumin

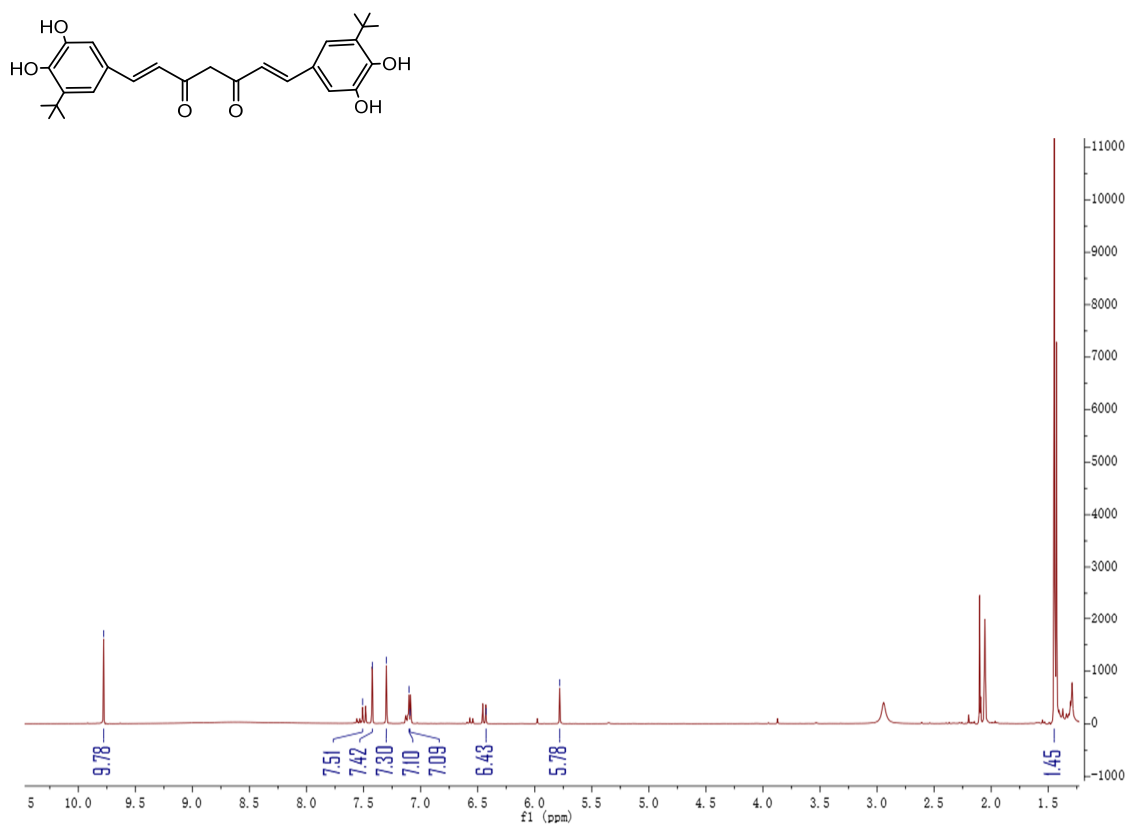

Figure S8. <sup>1</sup>H and <sup>13</sup>C NMR spectrum of 1E,6E-1,7-bis(3-*tert*-butyl-4,5-dihydroxyphenyl)hepta-1,6-diene-3,5-dione
